# Supplementary material
Source: Royal Society of Chemistry journal article supplement (doi:10.1039/d5cc07012k)
Supplement: d5cc07012k1.pdf [file d5cc07012k1.pdf]

## Supplementary Material

### **Selective Electro-Oxidation of Methane to Methanol at Room Temperature Using a Flow Reactor**

Muhammad Mustapha Adam<sup>a</sup>, Chanbasha Basheer<sup>a,b\*</sup>

#### **Table of contents**

| <b>Title</b> | <b>Content</b>                                                                                                                                              |
|--------------|-------------------------------------------------------------------------------------------------------------------------------------------------------------|
| Note 1       | Gas chromatography Analysis                                                                                                                                 |
| Fig. S1      | GC Chromatogram of (a) CH <sub>4</sub> reaction (b) CH <sub>4</sub> , O <sub>2</sub> reaction (c) 10 ppm methanol/ethanol standard                          |
| Fig. S2      | GC Chromatogram of (a) water, (b) O <sub>2</sub> gas instead of methane, (c) bare graphite                                                                  |
| Fig. S3      | GC chromatogram of gas samples of the CH <sub>4</sub> reaction under optimized conditions                                                                   |
| Fig. S4      | Fig. S4: Methane conversion current density at 0.9 V. Constant current density clearly shows the steady conversion of methane to methanol.                  |
| Fig. S5      | Atomic absorption spectroscopy analysis of Fe concentration on the freshly prepared catalytic surface (sample ID 1) and after multiple times (sample ID 2). |
| Fig. S6      | SEM Image of GF- $\alpha$ -Fe <sub>2</sub> O <sub>3</sub> after reaction                                                                                    |
| Fig. S7      | <sup>13</sup> C of the post reaction sample for the reaction of (a) methane, (b) methane + O <sub>2</sub> , under optimized conditions                      |
| Fig. S8      | GC-FID chromatogram for SPME injection                                                                                                                      |
| Fig. S9      | Methanol and ethanol calibration using <sup>1</sup> H NMR and DMSO as an internal standard                                                                  |

### *Possible Mechanism of Methane to Methanol*

A possible mechanism of OH radical might be in a proton exchange membrane fuel cell with a Nafion membrane, where hydroxyl radicals ( $\bullet\text{OH}$ ) may form in the presence of an  $\text{Fe}^{2+}$  catalyst. During operation, oxygen reduction may produce hydrogen peroxide ( $\text{H}_2\text{O}_2$ ) as a side product.  $\text{Fe}^{2+}$  reacts with  $\text{H}_2\text{O}_2$  through a Fenton reaction, generating highly reactive  $\bullet\text{OH}$  radicals and  $\text{OH}^-$  ions. These radicals interact with methane to form methanol.

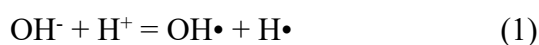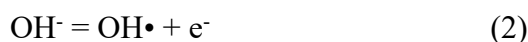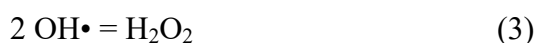

Because the generated  $\text{OH}\bullet$  is more reactive than  $\text{H}_2\text{O}_2$  and quickly consumed, the addition of  $\text{Fe}^{2+}$  reagent can effectively break the pre-formed  $\text{H}_2\text{O}_2$  back into the  $\text{OH}\bullet$  species to further provide an enhanced oxidation environment through Fenton reaction (equations 6, 7, and 8)

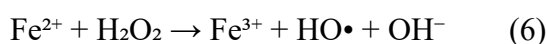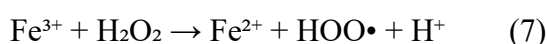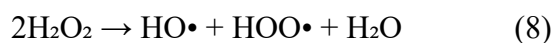

The addition of  $\text{Cl}^-$  in water acts as a spectator ion in the solution. It helps improve the solubility of methane. Methylene chloride ( $\text{CH}_2\text{Cl}_2$ ) can react with hydroxide ions ( $\text{OH}^-$ ) through a hydrolysis reaction, in which the hydroxide ion replaces chlorine atoms. During this substitution process, intermediate compounds form and can eventually convert to methanol ( $\text{CH}_3\text{OH}$ ).

### ***Gas chromatography Analysis***

The GC-FID analysis was performed using a Supelco wax column, 60 m long with an internal diameter of 0.25-0.32 mm. Helium was used as the carrier gas at a flow rate of 1 mL min<sup>-1</sup>. The oven temperature was held at 70 °C for 2 min, then ramped at 8 °C min<sup>-1</sup> to 250 °C, with the FID maintained at 250 °C. Blank experiments, including bare graphite felt, water-only, and oxygen in place of methane, were analyzed prior to methane oxidation. All blank chromatograms showed only the water peak at ~6.0 min, confirming the absence of alcohols (Fig. S2).

### ***Gas products analysis***

In addition to liquid products, methane conversion generated gaseous species; therefore, the gases were collected in a gas sampling bag and injected into a gas chromatograph coupled with flame ionization detection. The chromatogram shows the CO<sub>2</sub> peak at about 1 minute, Hydrogen at 10 minutes, methane at around 13 minutes, and an additional peak within 1 minute due to purging the gas. The chromatogram is shown in Fig. S3 below.

Before the analysis, Analytical calibration for GC was performed using Argon as an internal standard. Calibration mixtures were prepared by varying the CH<sub>4</sub> flow rate to obtain CH<sub>4</sub> volume fractions of 1–10% while maintaining a constant Ar flow rate. The CH<sub>4</sub> and Ar streams were combined at a T- junction, allowing thorough mixing before direct introduction into the GC. Quantification of CH<sub>4</sub> (and, where applicable, CO and CO<sub>2</sub>) was based on the ratio of the target-gas peak area to the Ar peak area. Calibration curves were constructed by plotting the peak-area ratio versus the corresponding concentration ratio, and all target gases showed linear behavior ( $R^2 > 0.99$ )

### ***Nuclear Magnetic Resonance Analysis***

The product samples were analyzed by nuclear magnetic resonance (NMR) spectroscopy on a JEOL ECZLR 600R spectrometer (JEOL Ltd., Tokyo, Japan) operating at 600 MHz. <sup>1</sup>H NMR spectra were acquired in water suppression mode for greater accuracy, using D<sub>2</sub>O as the solvent. All spectra were acquired using 128 scans. For each analysis, 0.5 mL of post-reaction sample was combined with 0.1 mL of a dimethyl sulfoxide (DMSO) internal standard solution (10 ppm) and 0.1 mL D<sub>2</sub>O. A calibration curve was generated by plotting the concentration of the standard product solution against the integrated areas of the product and DMSO signals. Product

quantification was achieved by comparing the  $^1\text{H}$  NMR signal with this calibration curve. The calibration curves for methanol and ethanol are shown in Fig. S9 below.

### ***Methane conversion, methanol selectivity and yield***

Methane conversion was calculated by comparing the molar amount of  $\text{CH}_4$  before and after reaction:  $h^{-1}$

$$\text{Conversion} = \frac{n\text{CH}_{4, \text{final}} - n\text{CH}_{4, \text{initial}}}{n\text{CH}_{4, \text{initial}}} \times 100 \% \#1$$

$$\text{Methanol selectivity} = \frac{n \text{CH}_3\text{OH}}{n \text{ total oxygenates}} \times 100 \% \#2$$

$$\text{Yield of Product } (\mu\text{mol g}^{-1} \text{ cat} h^{-1}) = \frac{n \text{CH}_3\text{OH}}{g_{\text{cat}} * t} \#3$$

### ***Faradaic efficiency calculation***

The faradaic efficiency (FE) was calculated as:

$$\text{Faradaic efficiency} = \frac{n\text{CH}_3\text{OH} * N * F}{Q} \times 100 \% \quad 4$$

where  $n_{\text{CH}_3\text{OH}}$  is the amount of methanol produced (mol),  $N$  is the number of electrons transferred per mole of methanol,  $F$  is the Faraday constant ( $96485 \text{ C mol}^{-1}$ ), and  $Q$  is the total charge passed during electrolysis obtained by integrating the chronoamperometry curve.

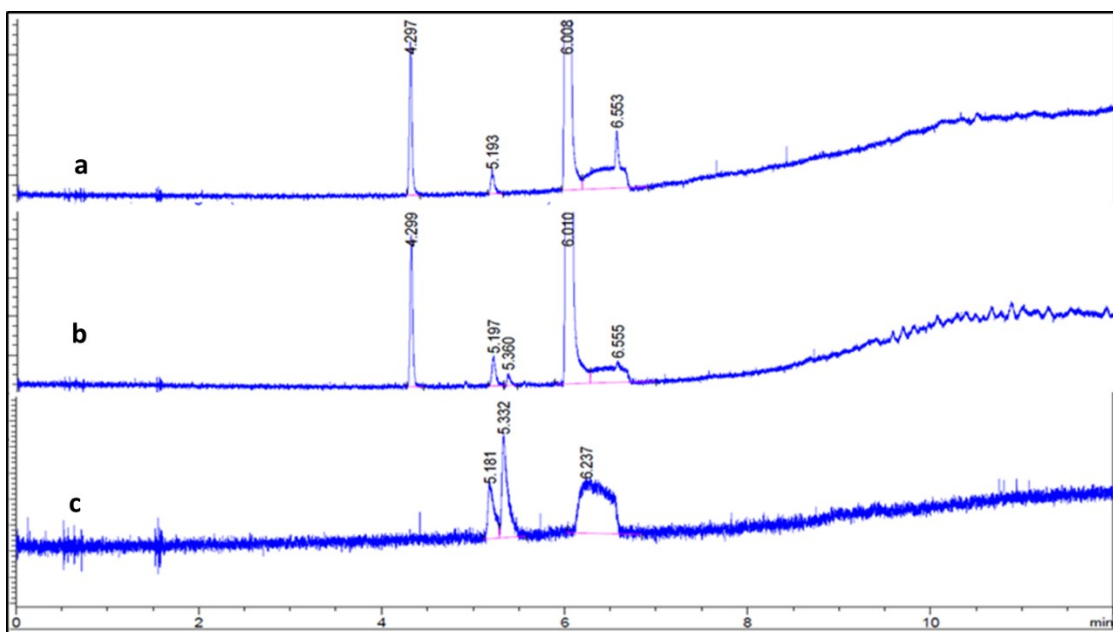

Fig. S1 GC Chromatograms of (a) CH<sub>4</sub> reaction (b) CH<sub>4</sub>, O<sub>2</sub> reaction (c) 10 ppm methanol/ethanol standard

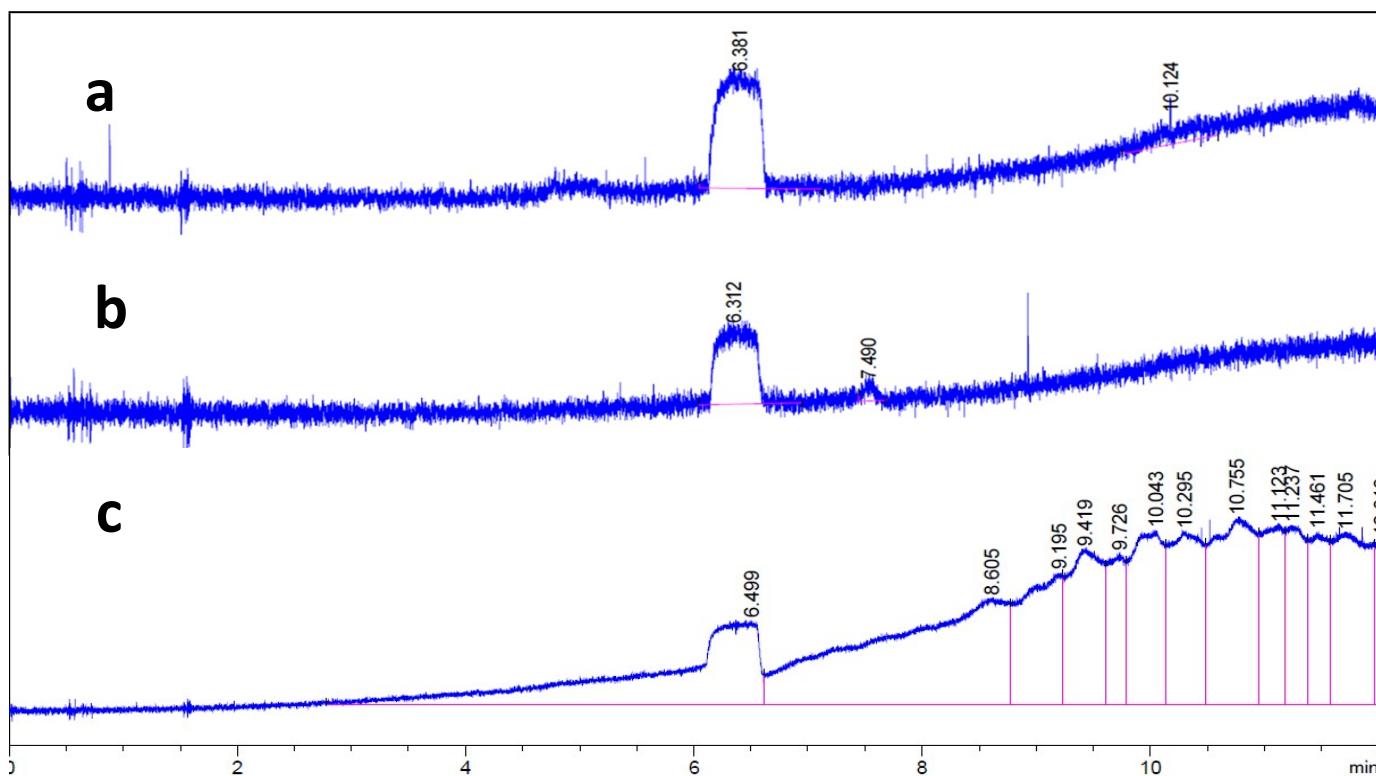

Fig. S2 GC Chromatogram of (a) water (b) O<sub>2</sub> gas instead of methane (c) bare graphite

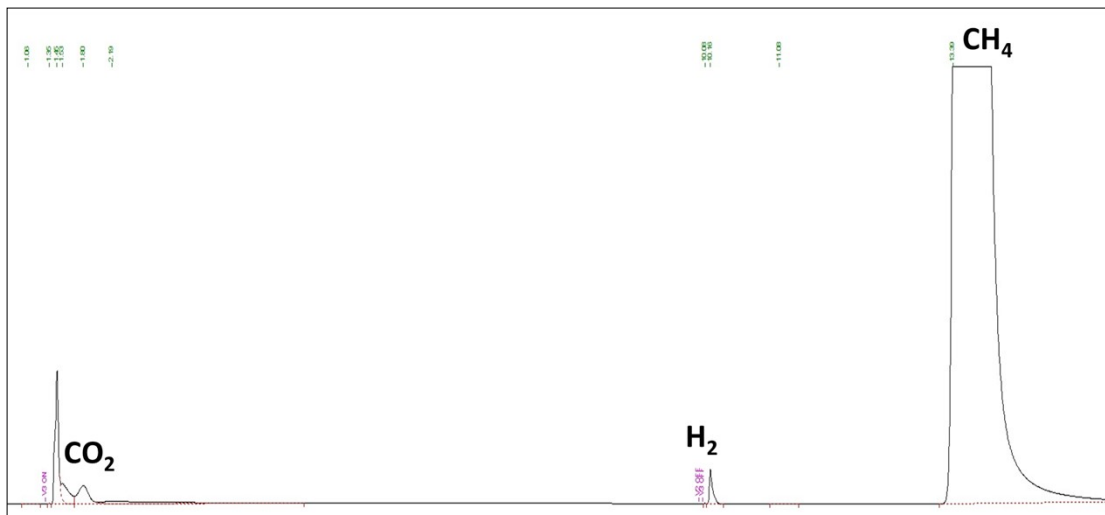

Fig. S3 GC chromatogram of gas samples of the CH<sub>4</sub> reaction under optimized conditions

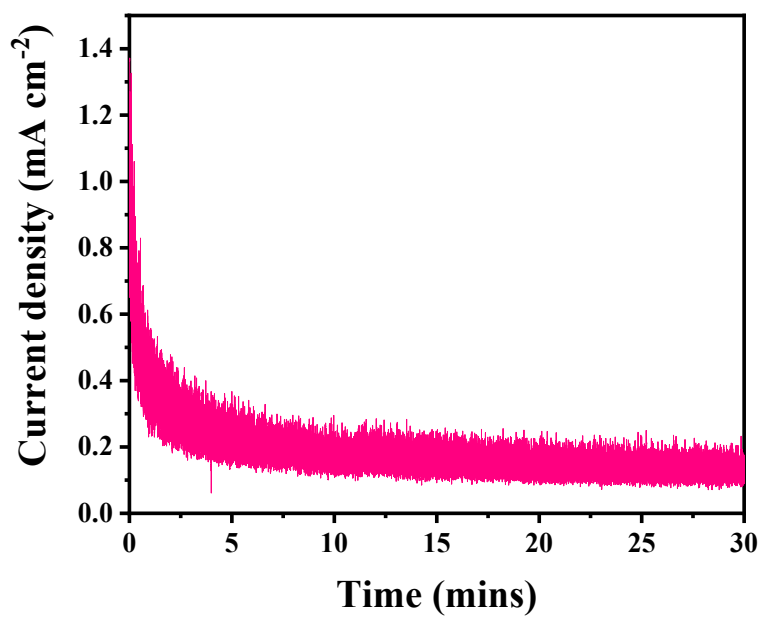

Fig. S4: Methane conversion current density at 0.9 V. Constant current density clearly shows the steady conversion of methane to methanol.

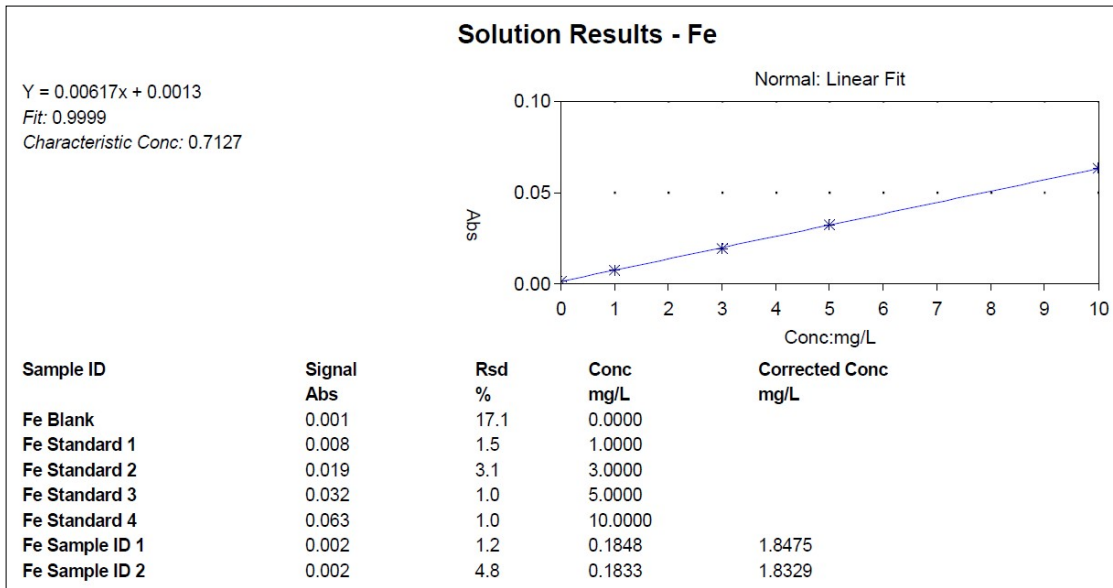

Fig. S5: Atomic absorption spectroscopy analysis of Fe concentration on the freshly prepared catalytic surface (sample ID 1) and after multiple times (sample ID 2).

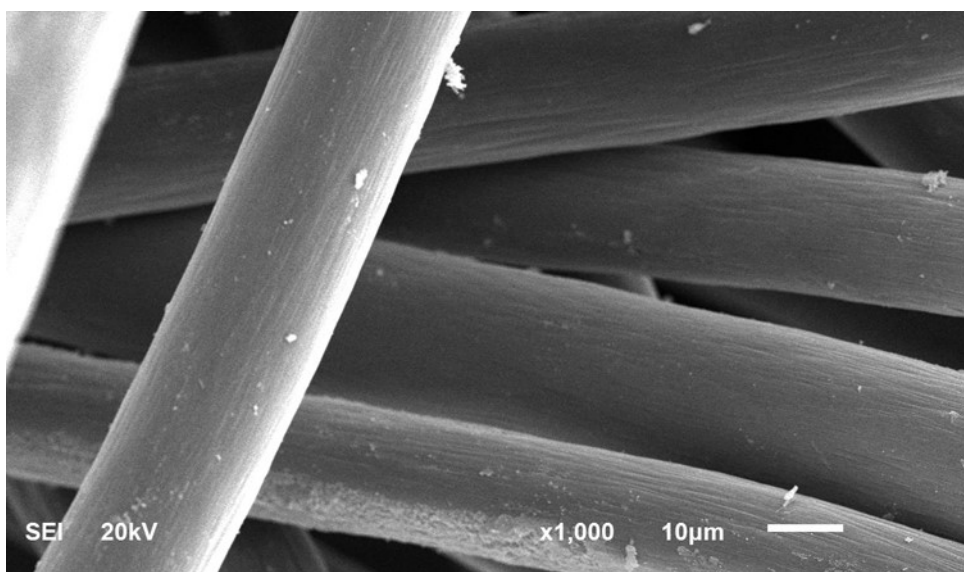

Fig. S6: SEM Image of GF- $\alpha$ -Fe<sub>2</sub>O<sub>3</sub> after reaction

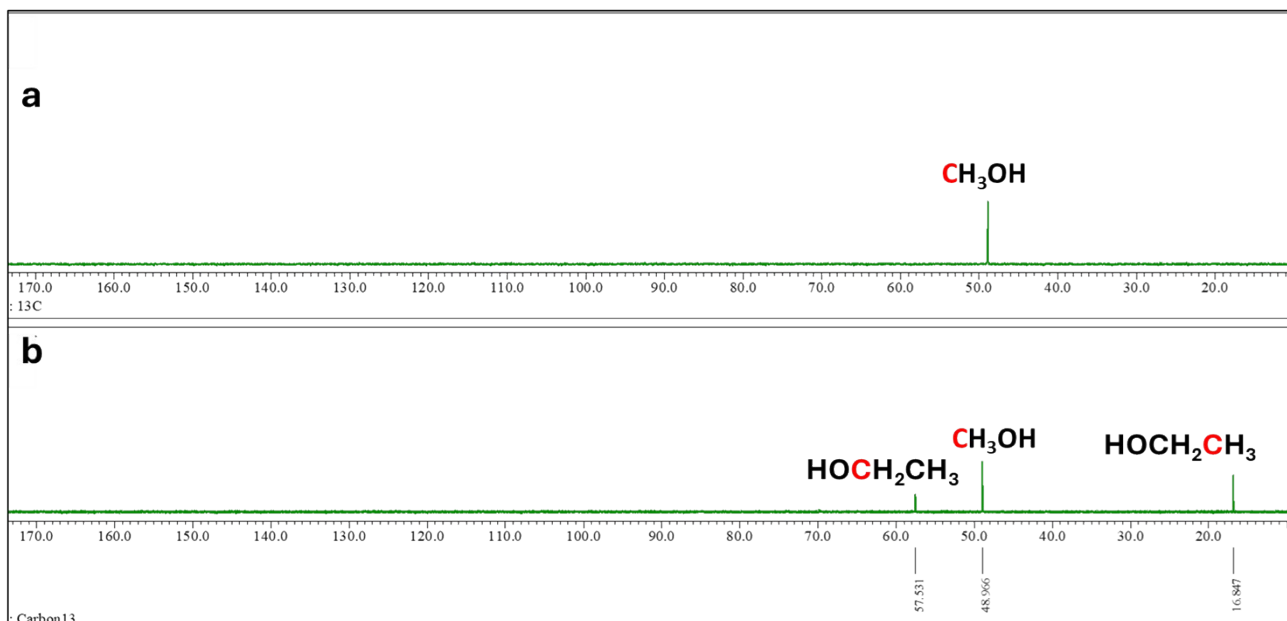

Fig. S7:  $^{13}\text{C}$  of the post reaction sample for the reaction of (a) methane (b) methane +  $\text{O}_2$  under optimized conditions

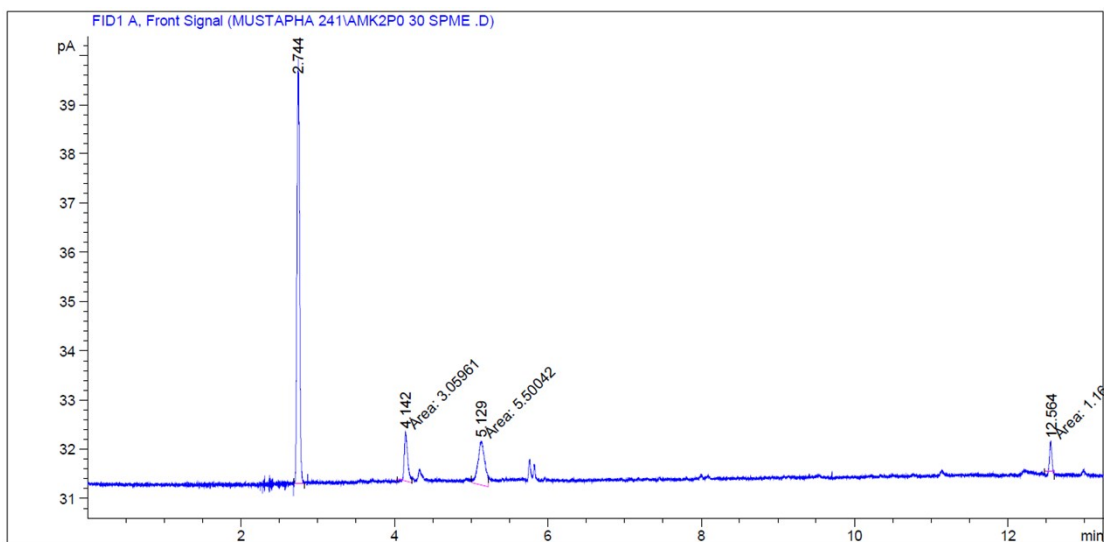

Fig. S8 GC-FID chromatogram for SPME injection of methane reaction

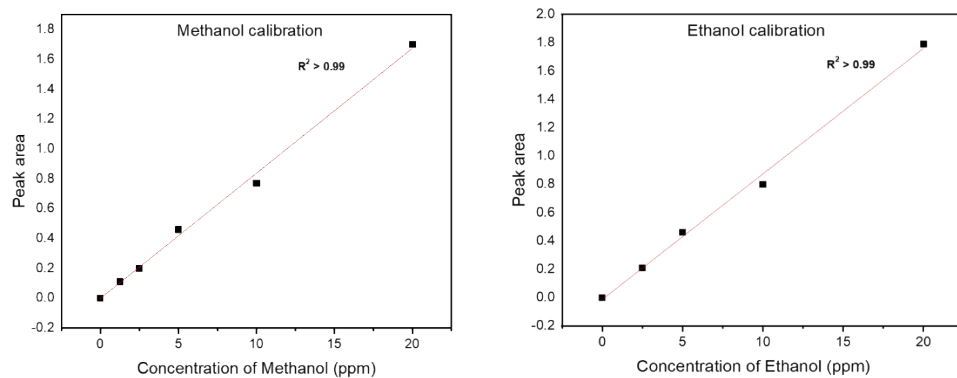

Fig. S9 methanol and ethanol calibration using  $^1\text{H}$  NMR and DMSO as internal standard
